# Supplementary material
Source: MDPI journal article supplement (https://www.mdpi.com/2071-1050/12/4/1464)
Supplement: s1 [file s1]

## Preparedness Perspective of the Conceptual Reference Framework for Enterprise Resilience Enhancement

| Level            | Origin   | Suborigin | Disruptive event                                  | Preventive actions / Preparedness Capacity                                                      |
|------------------|----------|-----------|---------------------------------------------------|-------------------------------------------------------------------------------------------------|
| -Inter           | Customer | Demand    | Unpredictable changes in demand                   | Study of changes in the demand pattern                                                          |
|                  |          |           |                                                   | Study of demand historical outliers                                                             |
|                  |          |           |                                                   | Study of the prospective forecast                                                               |
|                  |          |           |                                                   | Implementation of demand forecasting systems                                                    |
|                  |          |           |                                                   | Search for additional production capacity                                                       |
|                  |          |           |                                                   | Search for alternative providers                                                                |
|                  |          |           |                                                   | Implementation of adequate commercial management                                                |
|                  |          |           |                                                   | Implementation of marketing and sales practices that minimise changes in demand                 |
|                  |          |           |                                                   | Implementation of flexible production systems                                                   |
|                  |          |           |                                                   | Study of changes in the demand pattern                                                          |
| -Intra<br>-Inter | Customer | Demand    | Errors in the demand forecast                     | Quantitative analysis of the demand forecast errors                                             |
|                  |          |           |                                                   | Comparison of the different methods of demand forecast with regard to the demand errors         |
|                  |          |           |                                                   | Implementation of demand forecast systems                                                       |
|                  |          |           |                                                   | Implementation of demand-driven systems                                                         |
|                  |          |           |                                                   | Review of the reliability of the input and output information of the demand forecast            |
|                  |          |           |                                                   | Periodic review of the mathematical / technical models used to perform the demand forecast      |
| -Inter           | Customer | Loyalty   | One of our key customers changes the manufacturer | Definition of strategies of credibility and image of the focal firm                             |
|                  |          |           |                                                   | Definition of strategies (barriers) that make difficult for customers to move from manufacturer |
|                  |          |           |                                                   | Definition of the diversification strategies of the sources of incomes                          |
|                  |          |           |                                                   | Definition of customers loyalty strategies                                                      |
|                  |          |           |                                                   | Definition of promotion / price negotiation strategies ...                                      |
|                  |          |           |                                                   | Implementation of policies that promote the strategy of "offering services"                     |
|                  |          |           |                                                   | Implementation of customer relationship management systems (CRM) and data analysis              |

| Level            | Origin   | Suborigin                 | Disruptive event                                            | Preventive actions / Preparedness Capacity                                                                                                                                                                                                                                                                                                                                                                                                                     |
|------------------|----------|---------------------------|-------------------------------------------------------------|----------------------------------------------------------------------------------------------------------------------------------------------------------------------------------------------------------------------------------------------------------------------------------------------------------------------------------------------------------------------------------------------------------------------------------------------------------------|
|                  |          |                           |                                                             | Implementation of an adequate and efficient contracting management through the establishment of long-term agreements / contracts with customers.                                                                                                                                                                                                                                                                                                               |
| -Inter           | Customer | Financial                 | Financial problems of our customers                         | Third party insurance contracts covering such disruptive events<br>Definition of strategies to monitor the customers financial risk<br>Definition of strategies for negotiation and renegotiation of the payment terms                                                                                                                                                                                                                                         |
| -Intra           | Customer | Innovation / Requirements | Lack of innovation to meet customers' needs                 | Analysis of the optimal way to protect intellectual / industrial property rights<br>Training and coaching of human capital<br>Definition of planned obsolescence policies by determining the end of the lifecycle of a product<br>Implementation of R+D+i (Research, Development and Innovation)<br>Implementation of open innovation strategies                                                                                                               |
| -Inter<br>-Extra | Customer | Location                  | Geographic dispersion of our customers                      | Guidance of the focal firm in different cultures and customers' characteristics depending on their geographical location<br>Definition of ICT communication systems (asynchronous and synchronous)<br>Definition of a sales force structured by territories                                                                                                                                                                                                    |
| -Inter           | Customer | Deadlines                 | Our customers require increasingly demanding delivery times | Classification ABC-XYZ<br>Definition of negotiation policies about delivery deadlines with customers<br>Study of changing the order fulfilment strategy, for example, from MTS to MTO or ATO<br>Study and implementation of policies that promote more flexible and faster production systems<br>Outsourcing part of the production<br>Safety stocks<br>Utilization of overtime labour and idle production capacity<br>Assessment of the urgent transport cost |

| Level  | Origin     | Suborigin                 | Disruptive event                                        | Preventive actions / Preparedness Capacity                                                                                                                                                         |
|--------|------------|---------------------------|---------------------------------------------------------|----------------------------------------------------------------------------------------------------------------------------------------------------------------------------------------------------|
| -Inter | Customer   | Innovation / Requirements | New requirements of our customers to customize products | Considering the change of order fulfilment strategy, e.g. from a MTS to MTO/ATO strategy                                                                                                           |
|        |            |                           |                                                         | Establishment of co-design systems                                                                                                                                                                 |
|        |            |                           |                                                         | Implementation of continuous R&D+i (Research, Development and Innovation)                                                                                                                          |
|        |            |                           |                                                         | Implementation of regular monitoring systems of analysis trends                                                                                                                                    |
| -Inter | Customer   | Innovation / Requirements | Critical changes in our customers' requirements         | Design and production engineering and production processes prepared for product customization                                                                                                      |
|        |            |                           |                                                         | Establishment of monitoring policies and periodic analysis of the needs and requirements of customers (general changes)                                                                            |
|        |            |                           |                                                         | Establishment of monitoring policies and periodic analysis of market trends (changes in products)                                                                                                  |
|        |            |                           |                                                         | Implementation of R+D+i activities (Research, Development and Innovation) (changes in products)                                                                                                    |
| -Intra | Production | Capacity                  | Limiting changes in the capacity of production          | Promotion of policies to create a diversified offer (products, services, business models) so that if the offer is wide and dynamic, the customer can choose between the solutions already proposed |
|        |            |                           |                                                         | Concurrent engineering in the design of products (changes in products)                                                                                                                             |
|        |            |                           |                                                         | Analysis of the production capacity constraints                                                                                                                                                    |
|        |            |                           |                                                         | Study of changing the order fulfilment strategy, for example, from MTS to MTO or ATO                                                                                                               |
| -Intra | Production | Capacity                  | Limiting changes in the capacity of production          | Implementation of demand forecasting systems                                                                                                                                                       |
|        |            |                           |                                                         | Introduction of strategies for reducing setting-up times                                                                                                                                           |
|        |            |                           |                                                         | Introduction of advanced predictive maintenance systems to increase the availability of production resources                                                                                       |
|        |            |                           |                                                         | Production detailed Planning - Optimization of the Master Plan Scheduling                                                                                                                          |
|        |            |                           |                                                         | Safety stock                                                                                                                                                                                       |

| Level             | Origin     | Suborigin                  | Disruptive event                                                                                       | Preventive actions / Preparedness Capacity                                                                                                                                                |
|-------------------|------------|----------------------------|--------------------------------------------------------------------------------------------------------|-------------------------------------------------------------------------------------------------------------------------------------------------------------------------------------------|
| -Intra -<br>Inter | Production | Equipment and<br>machinery | Breakdown /<br>failure of machines<br>and / or key<br>equipment                                        | Definition of alternative routes and flexible equipment purchases                                                                                                                         |
|                   |            |                            |                                                                                                        | Establishment of product-service systems contracts with equipment suppliers                                                                                                               |
|                   |            |                            |                                                                                                        | Backward vertical integration of the technical service                                                                                                                                    |
|                   |            |                            |                                                                                                        | Total preventive maintenance                                                                                                                                                              |
|                   |            |                            |                                                                                                        | Modernisation of the technical service through technology                                                                                                                                 |
|                   |            |                            |                                                                                                        | Negotiation with competitors (orders to competitors)                                                                                                                                      |
|                   |            |                            |                                                                                                        | Nearest technical service                                                                                                                                                                 |
|                   |            |                            |                                                                                                        | Utilisation of the maximum capacity of other similar machines                                                                                                                             |
| -Intra -<br>Inter | Production | Process /<br>Requirements  | The process of<br>new products<br>development does<br>not meet the<br>requirements of<br>our customers | Adjustments of existing products to meet customers' requirements                                                                                                                          |
|                   |            |                            |                                                                                                        | Development of prototype or pre-production activities before the launching of new products                                                                                                |
|                   |            |                            |                                                                                                        | Testing of new products by external agents (taking into account confidentiality issues)                                                                                                   |
|                   |            |                            |                                                                                                        | Establishment of shared risk policies in the development of new projects / products                                                                                                       |
|                   |            |                            |                                                                                                        | Implementation of co-design systems                                                                                                                                                       |
|                   |            |                            |                                                                                                        | Implementation of collaborative information exchange systems                                                                                                                              |
|                   |            |                            |                                                                                                        | Use of formalized and known methods for the development of new products (for example, Quality Function Deployment - QFD, theory of the resolution of invention-related tasks - TRIZ, etc) |
|                   |            |                            |                                                                                                        | Adoption of design approaches for manufacturing and assembly processes                                                                                                                    |
| -Intra            | Production | Processes                  | Production<br>operations that<br>become<br>increasingly<br>complex                                     | Adoption of modularization and postponement strategies                                                                                                                                    |
|                   |            |                            |                                                                                                        | Training of human capital on operational aspects of the production department.                                                                                                            |
|                   |            |                            |                                                                                                        | Professional recycling                                                                                                                                                                    |
|                   |            |                            |                                                                                                        | Detailed definition of tasks, roles and responsibilities                                                                                                                                  |
|                   |            |                            |                                                                                                        | Development of prototyping or pre-production before the launch of new products                                                                                                            |
|                   |            |                            |                                                                                                        | Implementation of advanced technologies for production planning and control                                                                                                               |
|                   |            |                            |                                                                                                        | Rationalization of the products' offer                                                                                                                                                    |
|                   |            |                            |                                                                                                        | Reviews of the design concept and development of new products                                                                                                                             |

| Level             | Origin     | Suborigin                | Disruptive event                                                                                          | Preventive actions / Preparedness Capacity                                                                                               |
|-------------------|------------|--------------------------|-----------------------------------------------------------------------------------------------------------|------------------------------------------------------------------------------------------------------------------------------------------|
| -Intra -<br>Extra | Production | Product                  | Our products are subjected to new and stringent storage restrictions to maintain its integrity and purity | Agreements with 3PL (Third Party Logistics) and 4PL operators                                                                            |
|                   |            |                          |                                                                                                           | Implementation of optimization algorithms based on the storage criteria required                                                         |
|                   |            |                          |                                                                                                           | Implementation of warehouse management systems taking into account the criteria for loading trucks (according to the above restrictions) |
|                   |            |                          |                                                                                                           | Constant monitoring of the legislation and regulations concerning the sector                                                             |
|                   |            |                          |                                                                                                           | Implementation of traceability and control systems in real time (RFID, barcodes, GPS ...)                                                |
| -Intra            | Production | Product /<br>quality     | Production of defective or poor quality products                                                          | Supplier qualification. Inspection and Testing of raw materials                                                                          |
|                   |            |                          |                                                                                                           | General training for quality                                                                                                             |
|                   |            |                          |                                                                                                           | Quality control at every point of the production line                                                                                    |
|                   |            |                          |                                                                                                           | Implementation of concerted quality systems with our suppliers                                                                           |
|                   |            |                          |                                                                                                           | Total preventive maintenance of equipment                                                                                                |
| -Intra -<br>Inter | Production | Product /<br>quality     | Delivery of defective (poor quality) products to our customers                                            | System of quality assurance                                                                                                              |
|                   |            |                          |                                                                                                           | General training for quality                                                                                                             |
|                   |            |                          |                                                                                                           | Quality control at every point of the production line                                                                                    |
|                   |            |                          |                                                                                                           | Exhaustive control and inspection in the shipment area                                                                                   |
|                   |            |                          |                                                                                                           | Total preventive maintenance of equipment                                                                                                |
| -Extra            | Production | Product /<br>competitors | Significant product innovations of our competitors                                                        | System of quality assurance                                                                                                              |
|                   |            |                          |                                                                                                           | Market analysis on needs and what customers/consumers really value                                                                       |
|                   |            |                          |                                                                                                           | Benchmarking                                                                                                                             |
|                   |            |                          |                                                                                                           | Research, innovation and continuous development                                                                                          |
|                   |            |                          |                                                                                                           | Opportunities identification systems through the sales department                                                                        |
| -Extra            | Production | Product / prices         | Sudden and strong competition in prices of our products                                                   | Implementation of co-design systems                                                                                                      |
|                   |            |                          |                                                                                                           | Periodic analysis of competitors                                                                                                         |
|                   |            |                          |                                                                                                           | Search for alternative suppliers                                                                                                         |
|                   |            |                          |                                                                                                           | Improved image and reputation of the company (advertising, respectful environment, social actions ...)                                   |
|                   |            |                          |                                                                                                           | Introduction of differentiating values to our products (innovation)                                                                      |
|                   |            |                          |                                                                                                           | Outsourcing of part of the production                                                                                                    |

| Level            | Origin       | Suborigin | Disruptive event                          | Preventive actions / Preparedness Capacity                                                                                                                                |
|------------------|--------------|-----------|-------------------------------------------|---------------------------------------------------------------------------------------------------------------------------------------------------------------------------|
|                  |              |           |                                           | Improvement in production or distribution processes                                                                                                                       |
|                  |              |           |                                           | Reduction in costs through efficiency and quality techniques                                                                                                              |
| -Intra<br>-Inter | Distribution | Capacity  | Limited capacity of the distribution      | Agreements with 3PL (Third Party Logistics) and 4PL operators                                                                                                             |
|                  |              |           |                                           | Optimization of the planning and distribution processes                                                                                                                   |
|                  |              |           |                                           | Outsourcing of capacity to external logistics agents                                                                                                                      |
| -Extra           | Distribution | Prices    | Increase in fuel prices                   | Agreements with Third Party Logistics (3PL) and 4PL operators                                                                                                             |
|                  |              |           |                                           | Monitor oil prices evolution constantly                                                                                                                                   |
|                  |              |           |                                           | Definition and implementation of the costs range that the enterprise would like to bear                                                                                   |
|                  |              |           |                                           | Definition and implementation of a protocol to negotiate prices of finished products                                                                                      |
| -Extra           | Distribution | Transport | Disruptions related to railway transport  | Agreements with 3PL (Third Party Logistics) and 4PL operators                                                                                                             |
|                  |              |           |                                           | Search of alternative routes                                                                                                                                              |
|                  |              |           |                                           | Search of alternative transport means                                                                                                                                     |
|                  |              |           |                                           | Constant monitoring of the rail transport situation through the agencies responsible for providing such information (e.g. RENFE in Spain) as well as the weather forecast |
| -Extra           | Distribution | Transport | Disruptions related to road transport     | Agreements with 3PL (Third Party Logistics) and 4PL operators                                                                                                             |
|                  |              |           |                                           | Search of alternative routes                                                                                                                                              |
|                  |              |           |                                           | Search of alternative transport means                                                                                                                                     |
|                  |              |           |                                           | Constant monitoring of the rail transport situation through the agencies responsible for providing such information (e.g. DGT in Spain) as well as the weather forecast   |
| -Extra           | Distribution | Transport | Disruptions related to air transport      | Agreements with 3PL (Third Party Logistics) and 4PL operators                                                                                                             |
|                  |              |           |                                           | Search of alternative routes                                                                                                                                              |
|                  |              |           |                                           | Search of alternative transport means                                                                                                                                     |
|                  |              |           |                                           | Constant monitoring of the rail transport situation through the agencies responsible for providing such information (e.g. AENA in Spain) as well as the weather forecast  |
| -Extra           | Distribution | Transport | Disruptions related to maritime transport | Agreements with 3PL (Third Party Logistics) and 4PL operators                                                                                                             |
|                  |              |           |                                           | Search of alternative routes                                                                                                                                              |
|                  |              |           |                                           | Search of alternative transport means                                                                                                                                     |

| Level                      | Origin        | Suborigin  | Disruptive event                                                                | Preventive actions / Preparedness Capacity                                                                                                                                                                                                                                                                                                                                                                                                                                                                                                                                                                                             |
|----------------------------|---------------|------------|---------------------------------------------------------------------------------|----------------------------------------------------------------------------------------------------------------------------------------------------------------------------------------------------------------------------------------------------------------------------------------------------------------------------------------------------------------------------------------------------------------------------------------------------------------------------------------------------------------------------------------------------------------------------------------------------------------------------------------|
|                            |               |            |                                                                                 | Constant monitoring of the rail transport situation through the agencies responsible for providing such information (e.g. Maritime Agency in Spain) as well as the weather forecast                                                                                                                                                                                                                                                                                                                                                                                                                                                    |
| -Intra<br>-Inter<br>-Extra | Energetic     | Supply     | Interruption in the supply of water, gas, electricity, etc...                   | <p>Definition and implementation of formal protocols to proceed when supply interruptions occur</p> <p>Viability study and implementation of redundant systems (electric generators, etc.) to keep the enterprise running</p> <p>Implementation of real-time communication systems with energy supply providers</p> <p>Vertical backward integration (especially for electrical energy, e.g. solar panels)</p> <p>Negotiation with energy suppliers about penalty clauses if the energy supply is interrupted</p>                                                                                                                      |
| -Extra                     | Energetic     | Prices     | General increase of the prices of the supply of water, gas, electricity, etc... | <p>Definition and implementation of the costs range that the enterprise would like to bear</p> <p>Definition and implementation of a negotiation protocol about final products' prices</p> <p>Vertical backward integration (especially for electrical energy, e.g. solar panels)</p> <p>Constant monitoring of the energetic supplies prices evolutions (legislation, taxes, etc...)</p> <p>Have negotiated prices and conditions of supply with an alternative supplier</p>                                                                                                                                                          |
| -Intra                     | Environmental | Accidental | Fire                                                                            | <p>Risk analysis and modification of production processes according to the results of the analysis</p> <p>Training of the human capital on security measures for fire protection</p> <p>Constant revision, maintenance of fire hoses, ...</p> <p>Construction of the warehouse/facilities where the focal firm is located with high resistance to fire materials</p> <p>Insurance contracts that include clauses anti-fire</p> <p>Definition of firefighting policies in the case of storing flammable materials</p> <p>Definition of emergency evacuation protocols of the focal firm</p> <p>Implementation of anti-fire measures</p> |

| Level  | Origin        | Suborigin   | Disruptive event                                                        | Preventive actions / Preparedness Capacity                                                                                                        |
|--------|---------------|-------------|-------------------------------------------------------------------------|---------------------------------------------------------------------------------------------------------------------------------------------------|
| -Extra | Environmental | Competitors | Increase of competitors                                                 | Periodic fire drills                                                                                                                              |
|        |               |             |                                                                         | Periodic analysis of the competition                                                                                                              |
|        |               |             |                                                                         | Benchmarking                                                                                                                                      |
|        |               |             |                                                                         | Definition of differentiation strategies from competitors                                                                                         |
|        |               |             |                                                                         | Definition of strategies that promote the competitive advantages of the focal firm                                                                |
|        |               |             |                                                                         | Definition of policies to focus efforts on providing better customer service                                                                      |
|        |               |             |                                                                         | Implementation of policies for research, development and innovation                                                                               |
| -Extra | Environmental | Competitors | Entry of new competitors in emerging countries                          | Analysis of potential patents and intellectual property rights to protect the products/processes of the focal firm                                |
|        |               |             |                                                                         | Definition of policies that foster the creation of a high reputation and brand loyalty of the focal firm                                          |
|        |               |             |                                                                         | Definition of product differentiation policies                                                                                                    |
|        |               |             |                                                                         | Establishment of regulatory barriers related to product safety, working conditions, etc.                                                          |
|        |               |             |                                                                         | Robust access establishment to distribution channels                                                                                              |
| -Inter | Environmental | Natural     | The facilities of our customers are exposed to severe natural disasters | General increase in the customer base in different geographical locations                                                                         |
|        |               |             |                                                                         | Study by the focal enterprise of the most common natural disasters in the countries where our customers have facilities and give feedback to them |
|        |               |             |                                                                         | Promotion performed by the focal company to take out insurance contracts by the customers to face up to natural disasters                         |
|        |               |             |                                                                         | Simulation of different disaster scenarios and establishment of specific measures based on the simulation results                                 |



| Level  | Origin        | Suborigin | Disruptive event                                                          | Preventive actions / Preparedness Capacity                                                                                                                                                                                                      |
|--------|---------------|-----------|---------------------------------------------------------------------------|-------------------------------------------------------------------------------------------------------------------------------------------------------------------------------------------------------------------------------------------------|
| -Inter | Environmental | Natural   | The facilities of our suppliers are exposed to severe natural disasters   | General increase in the supply base                                                                                                                                                                                                             |
|        |               |           |                                                                           | Search for alternative raw materials or components                                                                                                                                                                                              |
|        |               |           |                                                                           | Search for alternative suppliers                                                                                                                                                                                                                |
|        |               |           |                                                                           | Study by the focal enterprise of the most common natural disasters in the countries where our customers have facilities and give feedback to them                                                                                               |
|        |               |           |                                                                           | Promotion performed by the focal company to take out insurance contracts by the customers to face up to natural disasters                                                                                                                       |
|        |               |           |                                                                           | Promotion by the focal firm to implement measures on suppliers facilities f. ex. having emergency supplies such as batteries, fuel, water and alternative communication systems, periodic inspection of the elements of the facilities, etc ... |
|        |               |           |                                                                           | Simulation of different disaster scenarios and establishment of specific measures based on the simulation results                                                                                                                               |
| -Intra | Environmental | Natural   | Our facilities are exposed to severe natural disasters                    | Safety stock                                                                                                                                                                                                                                    |
|        |               |           |                                                                           | Definition of business continuity plans                                                                                                                                                                                                         |
|        |               |           |                                                                           | Definition of emergency evacuation protocols                                                                                                                                                                                                    |
|        |               |           |                                                                           | Train human capital in security measures for fire protection                                                                                                                                                                                    |
|        |               |           |                                                                           | Periodic drills                                                                                                                                                                                                                                 |
| -Intra | Environmental | Policies  | Geopolitical instability in countries where our enterprise has facilities | Simulation of different disaster scenarios and establishment of specific measures based on simulation results                                                                                                                                   |
|        |               |           |                                                                           | Definition of a structured, analytical and comparative approach of potential political changes and government policies around the world.                                                                                                        |
|        |               |           |                                                                           | Definition and analysis of indicators related to the degree of uncertainty in strategic countries that could lead adverse changes in the operations of the focal firm                                                                           |
|        |               |           |                                                                           | Strategic planning regarding the location of new facilities of the focal firm considering the situation of the governments in such countries                                                                                                    |
|        |               |           |                                                                           | Simulation of different geopolitical scenarios and establishment of specific measures based on the simulation results                                                                                                                           |

| Level  | Origin        | Suborigin | Disruptive event                                                          | Preventive actions / Preparedness Capacity                                                                                                                                                                                                                                                                                                                                                                                                                                                                                                                                                                                 |
|--------|---------------|-----------|---------------------------------------------------------------------------|----------------------------------------------------------------------------------------------------------------------------------------------------------------------------------------------------------------------------------------------------------------------------------------------------------------------------------------------------------------------------------------------------------------------------------------------------------------------------------------------------------------------------------------------------------------------------------------------------------------------------|
| -Inter | Environmental | Policies  | Geopolitical instability in countries where our customers have facilities | <p>General increase of the customer base in different geographical locations</p> <p>Development of geopolitical risk maps and analysis by pessimistic and optimistic criteria</p> <p>Simulation of different geopolitical scenarios and establishment of specific measures based on the simulation results</p>                                                                                                                                                                                                                                                                                                             |
| -Inter | Environmental | Policies  | Geopolitical instability in countries where our suppliers have facilities | <p>General increase in the supply base</p> <p>Search for alternative raw materials or components</p> <p>Search for alternative suppliers</p> <p>Simulation of different geopolitical scenarios and establishment of specific measures based on the simulation results</p> <p>Safety stock</p>                                                                                                                                                                                                                                                                                                                              |
| -Intra | Environmental | Crime     | Industrial espionage                                                      | <p>Definition of policies to change periodically passwords and protocols that allow access to different levels of information.</p> <p>Definition of employment contracts with a formal description of the activities that can be considered as espionage (or that may favor due to the absence of due diligence) and specify the consequences for the worker</p> <p>Have specific and constantly updated protection programs (antispymware, antivirus, firewall)</p> <p>Implementation of vigilance systems</p> <p>Establishment of an appropriate information policy about the consequences of inappropriate behavior</p> |
| -Intra | Environmental | Crime     | Sabotage, theft, vandalism, kidnapping and extortion                      | <p>Development of an educational programme for physical protection of facilities</p> <p>Control and registration of dissatisfied employees or those who often assume a negative attitude against the regulations established by the focal firm.</p> <p>Establishment of policies to promote human capital satisfaction of the focal firm.</p> <p>Establishment of vigilance and monitoring activities.</p> <p>Establishment of an efficient system of identification, registration and control of persons, packages and vehicles.</p>                                                                                      |

| Level            | Origin    | Suborigin        | Disruptive event                       | Preventive actions / Preparedness Capacity                                                                                                                                                                                                                                                                                                                                                                                                                                                                                     |
|------------------|-----------|------------------|----------------------------------------|--------------------------------------------------------------------------------------------------------------------------------------------------------------------------------------------------------------------------------------------------------------------------------------------------------------------------------------------------------------------------------------------------------------------------------------------------------------------------------------------------------------------------------|
|                  |           |                  |                                        | Registration of information about people with a history of subversive activities or sabotage. It would be desirable to establish coordination activities with State Security Agencies (if possible).                                                                                                                                                                                                                                                                                                                           |
| -Extra           | Financial | Credit           | Restricted access to credit            | <p>Create a reserve fund and define policies that maintain a percentage of the monetary reserve</p> <p>Study on the viability of turning to supply chain financing instruments</p> <p>Study and analyse policies supported by public institutions to fund companies (e.g. ICO, Enisa in Spain)</p> <p>Outsourcing and change of strategy to focus on those activities that provide added value</p> <p>Request for credit through reciprocal guarantee companies that act as guarantors of financing, assuming credit risks</p> |
| -Extra           | Financial | Interest         | Changes in the interest rates          | <p>Negotiation with banks about the variable interest rate</p> <p>Study the advisability of investing in products with a fixed interest rate</p> <p>Study the advisability of investing or asking for funding to foreign entities or foreign currency (e.g. CHF)</p>                                                                                                                                                                                                                                                           |
| -Inter<br>-Extra | Financial | Foreign exchange | Changes in the currency exchange rates | <p>Detailed analysis of the currency exchange rates and definition of negotiation strategies</p> <p>Definition of a standard conversion method to the reference currency when registering the accounting information</p> <p>Definition of hedging strategies to neutralize or reduce the risk of exposure to fluctuations in exchange rates</p> <p>Signature of contracts for commercial transactions in the future at a exchange rate agreed upon in the present</p>                                                          |
| -Intra           | Financial | Cash flow        | Cash problems                          | <p>Search for a sponsor</p> <p>Creating a reserve fund and definition of policies that maintain a percentage of the monetary reserve</p> <p>Debt issuance</p> <p>Study on the viability of turning to supply chain financing instruments</p>                                                                                                                                                                                                                                                                                   |

| Level            | Origin    | Suborigin               | Disruptive event                                                       | Preventive actions / Preparedness Capacity                                                                                                                       |
|------------------|-----------|-------------------------|------------------------------------------------------------------------|------------------------------------------------------------------------------------------------------------------------------------------------------------------|
|                  |           |                         |                                                                        | Inventory liquidation with discount                                                                                                                              |
|                  |           |                         |                                                                        | Request for a loan                                                                                                                                               |
|                  |           |                         |                                                                        | Agreements with 3PL (Third Party Logistics) and 4PL operators                                                                                                    |
|                  |           |                         |                                                                        | Classification ABC-XYZ                                                                                                                                           |
| -Intra<br>-Inter | Inventory | Capacity                | Limited storage capacity                                               | Development of supply systems aligned to production needs (JIT, Kanban, ...)                                                                                     |
|                  |           |                         |                                                                        | Study of feasibility to use distribution centers                                                                                                                 |
|                  |           |                         |                                                                        | Study and evaluation of the physical layout of the warehouse and its percentage of utilization                                                                   |
|                  |           |                         |                                                                        | Study and evaluation of the optimal level of stock                                                                                                               |
|                  |           |                         |                                                                        | Training of the human capital for the early failure detection in the information related to inventory management                                                 |
|                  |           |                         |                                                                        | Design and development of secure and reliable software                                                                                                           |
|                  |           |                         |                                                                        | Quality control of computer programs to ensure the reliability of the information                                                                                |
|                  |           |                         |                                                                        | Identification and measurement of all the necessary key performance indicators and the required level of aggregation of data analysis                            |
| -Intra<br>-Inter | Inventory | Distrust                | Loss of time in the inventory management due to mistrust in the system | Implementation of the Internet of Things technology to increase data reliability and real-time updating (eg, radio frequency identification infrastructure)      |
|                  |           |                         |                                                                        | Implementation of analysis procedures to detect failures in the consistency of information                                                                       |
|                  |           |                         |                                                                        | Implementation of robust procedures to control the inputs and outputs of the warehouse                                                                           |
|                  |           |                         |                                                                        | Implementation in the inventory management software development of a complete congruence between the requirements of the focal company and the information needs |
|                  |           |                         |                                                                        | Redundant handling equipment                                                                                                                                     |
| -Intra           | Inventory | Equipment and machinery | Breakage of handling equipment                                         | Establishment of open contracts with suppliers that supply / rent equipment for maintenance (with or without operators).                                         |
|                  |           |                         |                                                                        | Total Preventive Maintenance                                                                                                                                     |
|                  |           |                         |                                                                        | Close technical service                                                                                                                                          |

| Level  | Origin    | Suborigin    | Disruptive event                                                                                         | Preventive actions / Preparedness Capacity                                                                                                                                                                                        |
|--------|-----------|--------------|----------------------------------------------------------------------------------------------------------|-----------------------------------------------------------------------------------------------------------------------------------------------------------------------------------------------------------------------------------|
| -Intra | Inventory | Mistakes     | Errors in products' identification                                                                       | Human capital training in both the operational and the analysis and understanding of the reasons that cause the misidentifications                                                                                                |
|        |           |              |                                                                                                          | Outsourcing of inventory management practices                                                                                                                                                                                     |
|        |           |              |                                                                                                          | Promotion of suitable facilities, equipment and personnel (lighting, room temperature, noise, drafts, work position, physical effort, stress, security, etc.) in order to identify correctly the products or the following phases |
|        |           |              |                                                                                                          | Implementation of the Internet of Things technology to increase data reliability and real-time updating (eg, radio frequency identification infrastructure)                                                                       |
|        |           |              |                                                                                                          | Implementation of a computer support system for the correct identification of products                                                                                                                                            |
|        |           |              |                                                                                                          | Implementation of a proper methodization and a high degree of formalization of the process of identifying products                                                                                                                |
| -Intra | Inventory | Inefficiency | High times in the search for materials, components and / or products necessary for the successive phases | Promotion of incentive and improvement programmes of the warehouse staff                                                                                                                                                          |
|        |           |              |                                                                                                          | Automation of the location of materials / products to physical locations of the warehouse                                                                                                                                         |
|        |           |              |                                                                                                          | Classification ABC-XYZ                                                                                                                                                                                                            |
|        |           |              |                                                                                                          | Definition of inventory management indicators in each of the operations to track real time status to detect inefficiencies                                                                                                        |
|        |           |              |                                                                                                          | Study and selection of the suitable storage equipment and the proper movements for the early identification and characterization of products                                                                                      |
|        |           |              |                                                                                                          | Implementation of information systems (e.g. RFID) to speed up the operations performed in the warehouse                                                                                                                           |
| -Intra | Inventory | Inefficiency | Reiteration of movements in the picking process                                                          | Human capital training related to picking and movement aspects                                                                                                                                                                    |
|        |           |              |                                                                                                          | Study the time spent on the routes to perform picking                                                                                                                                                                             |
|        |           |              |                                                                                                          | Study and evaluate the storage pattern of products for picking                                                                                                                                                                    |
|        |           |              |                                                                                                          | Systematic study and evaluation of the method used for picking to minimise the operator's movements, among others                                                                                                                 |

| Level  | Origin      | Suborigin         | Disruptive event                                          | Preventive actions / Preparedness Capacity                                                                                                                                                              |
|--------|-------------|-------------------|-----------------------------------------------------------|---------------------------------------------------------------------------------------------------------------------------------------------------------------------------------------------------------|
|        |             |                   |                                                           | Implementation of the Internet of Things technology (e.g. Radio Frequency Identification - RFID, Global Positioning System - GPS, etc.) to support storage and picking activities                       |
|        |             |                   |                                                           | Implementation of intelligent systems to optimise the picking process (guided to operators, movement of stacker cranes, etc.)                                                                           |
|        |             |                   |                                                           | Maintenance of handling equipment to effectively manipulate products                                                                                                                                    |
| -Intra | Inventory   | Traceability      | Loss of products' traceability within the storage area    | Human capital training in inventory management                                                                                                                                                          |
|        |             |                   |                                                           | Classification ABC-XYZ                                                                                                                                                                                  |
|        |             |                   |                                                           | Implementation of appropriate management practices                                                                                                                                                      |
|        |             |                   |                                                           | Implementation of a monitoring system to control the mobility of items in real time (RFID, barcode ....)                                                                                                |
| -Extra | Legislation | Imports / exports | New and more restrictive legislation of imports / exports | Design and development of flexible processes and fast and easily reconfigurable ones                                                                                                                    |
|        |             |                   |                                                           | Design and development of easily adaptable products that meet the most stringent requirements of new regulations (weight, composition, presentation, identification, labeling ...)                      |
|        |             |                   |                                                           | Participation in lobbying activities exerting pressure to influence decisions about legislation                                                                                                         |
|        |             |                   |                                                           | Constant monitoring of the different import and export trade regimes                                                                                                                                    |
|        |             |                   |                                                           | Constant monitoring of the countries under embargo and study of alternatives for such countries                                                                                                         |
| -Extra | Legislation | Processes         | Changes in legislation involving changes in our processes | Training of the company's employees in legal issues                                                                                                                                                     |
|        |             |                   |                                                           | Creation of an office of Sustainability and Energy Management (in the case of changes in the environmental legislation)                                                                                 |
|        |             |                   |                                                           | Definition and implementation of publicizing activities among customers about potential changes in the focal company's processes from a positive approach: processes more environmentally friendly, ... |
|        |             |                   |                                                           | Definition and implementation of formal protocols to deal with new legislation that concern the company's processes                                                                                     |

| Level  | Origin      | Suborigin     | Disruptive event                                         | Preventive actions / Preparedness Capacity                                                                                                                                                                              |
|--------|-------------|---------------|----------------------------------------------------------|-------------------------------------------------------------------------------------------------------------------------------------------------------------------------------------------------------------------------|
|        |             |               |                                                          | Design and development of flexible processes and fast and easily reconfigurable ones                                                                                                                                    |
|        |             |               |                                                          | Implementation of efficient communication systems among different functional units such as quality; research, development and innovation; legislation, production; etc....                                              |
|        |             |               |                                                          | Implementation of continuous monitoring systems to control new or existent regulations / laws that could potentially have effects in the company's processes                                                            |
|        |             |               |                                                          | Participation in lobbying activities exerting pressure to influence decisions about legislation                                                                                                                         |
|        |             |               |                                                          | Training of the company's employees in legal issues                                                                                                                                                                     |
|        |             |               |                                                          | Definition and implementation of publicizing activities among customers about potential changes in the focal company's products from a positive viewpoint: higher security...                                           |
|        |             |               |                                                          | Definition and implementation of formal protocols to deal with new legislation that concern the company's products                                                                                                      |
| -Extra | Legislation | Products      | Changes in legislation involving changes in our products | Design and development of easily adaptable products that meet the most stringent requirements of new regulations (weight, composition, presentation, identification, labeling ...)                                      |
|        |             |               |                                                          | Implementation of efficient communication systems among different functional units such as quality; research, innovation; legislation; new products development; etc....                                                |
|        |             |               |                                                          | Implementation of continuous monitoring systems to control new or existent regulations / laws that could potentially have effects in the company's products                                                             |
| -Intra | Social      | Lack of staff | Absenteeism                                              | Establishment of information systems to warn about the causes (sanctions and legal actions) that the enterprise would take in case of absenteeism so that all parties are familiar with the consequences of absenteeism |
|        |             |               |                                                          | Promotion of social responsibility policies                                                                                                                                                                             |
|        |             |               |                                                          | Implement changes in human resources management policies to involve workers and their opinions more                                                                                                                     |

| Level            | Origin | Suborigin     | Disruptive event                                        | Preventive actions / Preparedness Capacity                                                                                                                                                                          |
|------------------|--------|---------------|---------------------------------------------------------|---------------------------------------------------------------------------------------------------------------------------------------------------------------------------------------------------------------------|
|                  |        |               |                                                         | Research of the causes of absenteeism by implementing monitoring and control procedures of the staff                                                                                                                |
|                  |        |               |                                                         | Definition and implementation of policies to perform the most favourable negotiations with the enterprise staff                                                                                                     |
|                  |        |               |                                                         | Definition and implementation of "security and maintenance services" (if there are machines that need daily human control to avoid an interruption of such a machine)                                               |
| -Intra<br>-Inter | Social | Lack of staff | Strikes                                                 | Definition and implementation of "minimum services" (if the enterprise provides services to meet fundamental rights, public freedoms and constitutionally protected rights, both from the public or private sector) |
|                  |        |               |                                                         | Definition and implementation of policies to strengthen the corporate culture and generate motivation so that the human capital could feel identified with the enterprise and its strategy                          |
|                  |        |               |                                                         | Implementation of policies that promote the affiliation of workers to labor unions                                                                                                                                  |
|                  |        |               |                                                         | Implementation of policies of action to provide the enterprise with the necessary staff (f.ex. overtime perfectly paid ...)                                                                                         |
|                  |        |               |                                                         | Safety stock of both raw materials and / or components, and finished products                                                                                                                                       |
|                  |        |               |                                                         | Clear definition and implementation of the enterprise values through the mission and vision                                                                                                                         |
|                  |        |               |                                                         | Definition and implementation of strategies to develop the organizational culture and welfare of the enterprise                                                                                                     |
| -Intra           | Social | Culture       | Changes in the organizational culture of the enterprise | Definition and implementation of policies that create better relationships with both employees and customers                                                                                                        |
|                  |        |               |                                                         | Crisis management in a participatory manner                                                                                                                                                                         |
|                  |        |               |                                                         | Implementation of strong leaders to manage, lead and support the enterprise guidelines and to delegate to other employees giving them responsibility                                                                |
|                  |        |               |                                                         | Implementation of measures that promote the autonomy and responsibility of workers                                                                                                                                  |



| Level                      | Origin | Suborigin | Disruptive event                                     | Preventive actions / Preparedness Capacity                                                                                                                                                                                                                                                                                                                                                                                                                                                                                                                                                                                                                                                           |
|----------------------------|--------|-----------|------------------------------------------------------|------------------------------------------------------------------------------------------------------------------------------------------------------------------------------------------------------------------------------------------------------------------------------------------------------------------------------------------------------------------------------------------------------------------------------------------------------------------------------------------------------------------------------------------------------------------------------------------------------------------------------------------------------------------------------------------------------|
| -Intra<br>-Inter<br>-Extra | Social | Diseases  | Pandemic affecting our staff                         | <p>Definition and implementation of policies to protect the human capital and the reconciliation of the working life</p> <p>Definition and implementation of the annual work calendar specifying holidays and festivities</p> <p>Implementation of preventive work/accidents risk policies</p> <p>Implementation of strong leaders to manage, lead and support the enterprise guidelines and to delegate to other employees giving them responsibility</p> <p>Implementation of policies for the prevention of risks and accidents</p> <p>Implementation of protocols and information / training tools to limit the spread of the pandemic</p> <p>Limitation of the human capital overtime ratio</p> |
| -Intra                     | Social | Errors    | Serious errors of staff in the enterprise operations | <p>Implementation of training and coaching programmes for the human capital</p> <p>Definition and implementation of reward policies for the personnel based on the productivity level and the minimization of mistakes</p> <p>Implementation of improvements in the communication systems in order to properly inform the human capital</p> <p>Mapping and adaptation of the workers' skills with assigned tasks</p> <p>Redefinition and update of the processes and instructions assigned to each process</p> <p>Detailed monitoring of all the activities performed</p>                                                                                                                            |
| -Intra                     | Social | Hostility | Hostile environment at the enterprise                | <p>Implementation of training and coaching programmes for the human capital</p> <p>Clear definition and implementation of the enterprise values through the mission and vision</p> <p>Definition and implementation of negotiation policies with the enterprise human capital</p> <p>Definition and implementation of incentives when employees submit suggestions or even complaints</p> <p>Definition and implementation of a protocol when an employee makes a formal complaint, including in this protocol a procedure of feedback to the employee about the decision taken</p>                                                                                                                  |

| Level  | Origin | Suborigin          | Disruptive event                                         | Preventive actions / Preparedness Capacity                                                                                                           |
|--------|--------|--------------------|----------------------------------------------------------|------------------------------------------------------------------------------------------------------------------------------------------------------|
|        |        |                    |                                                          | Establishment of visible indicators about contributions, complaints, actions taken, etc ...                                                          |
|        |        |                    |                                                          | Establishment of employees' representing bodies (labour union, etc ...)                                                                              |
|        |        |                    |                                                          | Implementation of strong leaders to manage, lead and support the enterprise guidelines and to delegate to other employees giving them responsibility |
|        |        |                    |                                                          | Implementation of improvements in communication systems so that human capital is duly informed                                                       |
|        |        |                    |                                                          | Implementation of policies that promote social events                                                                                                |
|        |        |                    |                                                          | Implementation of suggestions/complaints boxes                                                                                                       |
|        |        |                    |                                                          | Definition and implementation of policies for employment promotion within the enterprise                                                             |
|        |        |                    |                                                          | Definition of performance indicators and monitoring their fulfilment                                                                                 |
| -Intra | Social | Critical Personnel | Key personnel leaving the enterprise                     | Definition of tasks, roles, responsibilities and performance and monitoring indicators of the achievement of such definition                         |
|        |        |                    |                                                          | Implementation of emphasis policies for recruiting and retaining outstanding employees                                                               |
|        |        |                    |                                                          | Implementation of policies that promote the social events                                                                                            |
|        |        |                    |                                                          | Registration of the human capital know-how                                                                                                           |
|        |        |                    |                                                          | Search for alternative raw materials or components                                                                                                   |
|        |        |                    |                                                          | Search for alternative suppliers                                                                                                                     |
| -Inter | Supply | Quality            | Poor quality of the raw materials or components supplied | Certification (audits) of quality in suppliers                                                                                                       |
|        |        |                    |                                                          | Implementation of quality systems agreed with our suppliers                                                                                          |
|        |        |                    |                                                          | Implementation of systems to constantly monitor suppliers/materials                                                                                  |
|        |        |                    |                                                          | Pre-production inspection                                                                                                                            |
|        |        |                    |                                                          | Safety stock of raw materials and/or components                                                                                                      |
|        |        |                    |                                                          | Search for alternative suppliers                                                                                                                     |
| -Inter | Supply | Capacity           | Limiting changes in the capacity of suppliers            | Definition of long-term contractual agreements with suppliers                                                                                        |
|        |        |                    |                                                          | Implementation of continuous monitoring systems of suppliers / materials                                                                             |
|        |        |                    |                                                          | Backward vertical integration                                                                                                                        |

| Level            | Origin | Suborigin                    | Disruptive event                                                              | Preventive actions / Preparedness Capacity                                                                                     |
|------------------|--------|------------------------------|-------------------------------------------------------------------------------|--------------------------------------------------------------------------------------------------------------------------------|
| -Inter           | Supply | Location                     | Geographic dispersion of our suppliers (time difference, language, proximity) | Search for alternative suppliers                                                                                               |
|                  |        |                              |                                                                               | Promotion of closer relationships                                                                                              |
|                  |        |                              |                                                                               | Implementation of real-time communication systems                                                                              |
|                  |        |                              |                                                                               | Implementation of continuous monitoring systems of suppliers / materials                                                       |
| -Intra<br>-Inter | Supply | Raw materials and components | Delay in the supply of raw materials or components                            | Encourage a common culture and argot for the entire supply chain                                                               |
|                  |        |                              |                                                                               | Implementation of penalties for delay                                                                                          |
|                  |        |                              |                                                                               | Search for alternative suppliers                                                                                               |
|                  |        |                              |                                                                               | Encouragement of collaborative work with suppliers and joint problem solving to establish realistic replenishment systems      |
| -Intra<br>-Inter | Supply | Raw materials and components | Shortage of raw materials                                                     | Implementation of continuous monitoring systems of suppliers / materials                                                       |
|                  |        |                              |                                                                               | Safety stock                                                                                                                   |
|                  |        |                              |                                                                               | Search for alternative raw materials or components                                                                             |
|                  |        |                              |                                                                               | Definition of products' new compositions                                                                                       |
| -Intra<br>-Inter | Supply | Raw materials and components | Shortage of raw materials                                                     | Definition of complementary products that do not require the scarce raw materials and replace the current products             |
|                  |        |                              |                                                                               | Implementation of Research, Development and Innovation operations to replace the existing raw materials by other complementary |
|                  |        |                              |                                                                               | Implementation of reverse logistics and recycling systems                                                                      |
|                  |        |                              |                                                                               | Analysis of the seasonality and trend (supply-demand balance) of raw materials prices                                          |
| -Inter<br>-Extra | Supply | Prices                       | Price fluctuations of the materials supplied                                  | Search for alternative raw materials or components                                                                             |
|                  |        |                              |                                                                               | Search for alternative suppliers                                                                                               |
|                  |        |                              |                                                                               | Definition of long-term contractual agreements with suppliers                                                                  |
|                  |        |                              |                                                                               | Vertical backward integration of part or all of the supply function                                                            |
|                  |        |                              |                                                                               | Negotiation with suppliers                                                                                                     |
| -Inter           | Supply | Supplier                     | Withdrawal of a key supplier                                                  | Close monitoring of commodity markets. Strategic purchases                                                                     |
|                  |        |                              |                                                                               | General increase in the supply base                                                                                            |
|                  |        |                              |                                                                               | Partnership with suppliers (temporary union of companies ...)                                                                  |

| Level            | Origin     | Suborigin          | Disruptive event                                               | Preventive actions / Preparedness Capacity                                                                                                                                              |
|------------------|------------|--------------------|----------------------------------------------------------------|-----------------------------------------------------------------------------------------------------------------------------------------------------------------------------------------|
|                  |            |                    |                                                                | Search for alternative suppliers                                                                                                                                                        |
|                  |            |                    |                                                                | Implementation of continuous monitoring systems of suppliers / materials                                                                                                                |
|                  |            |                    |                                                                | Vertical backward integration of part or all of the supply function                                                                                                                     |
| -Intra<br>-Inter | Technology | Technological base | Lack of technological infrastructure to support business needs | Analysis of the technological needs of the focal firm to define the new requirements                                                                                                    |
|                  |            |                    |                                                                | Definition of maintenance, renovation and modernization policies of the technological infrastructure                                                                                    |
|                  |            |                    |                                                                | Definition of support programs and technological training for the human capital of the company in order to encourage the maintenance and management of the technological infrastructure |
|                  |            |                    |                                                                | Establishment of professional services contracts with technology providers (for example "pay-per-use" contracts or performance-based contracts)                                         |
| -Extra           | Technology | Competitors        | Technological leap from our competitors                        | Benchmarking                                                                                                                                                                            |
|                  |            |                    |                                                                | Creation of barriers that hinder the entry of competitors in the development of our products                                                                                            |
|                  |            |                    |                                                                | Definition of technological research, development and innovation policies                                                                                                               |
|                  |            |                    |                                                                | Promotion of an attitude of Early Adopters, incorporating technological solutions and products and using them in a pioneering way                                                       |
| -Inter<br>-Extra | Technology | Crime              | Cybercrime (hacking, viruses, malicious code)                  | User training in computer security issues to try to prevent attacks in which the user would unwittingly giving authorization                                                            |
|                  |            |                    |                                                                | Definition of standards, protocols, methods and rules to minimize potential risks of the computers or the information infrastructure.                                                   |
|                  |            |                    |                                                                | Definition of the users access rights policy in order to avoid oversized rights.                                                                                                        |
|                  |            |                    |                                                                | Definition of actions to be taken when a computer vulnerability is detected and selection of human resources to be contacted in case of discovering a possible intrusion                |
|                  |            |                    |                                                                | Definition of maintenance policies of the IT infrastructure of the company                                                                                                              |
|                  |            |                    |                                                                | Implementation of anti-virus software and firewalls systems                                                                                                                             |
|                  |            |                    |                                                                | Performing regular backups                                                                                                                                                              |

| Level            | Origin     | Suborigin    | Disruptive event                                                         | Preventive actions / Preparedness Capacity                                                                                                                                                                                                                                                                                                                                                                                                                                                                                             |
|------------------|------------|--------------|--------------------------------------------------------------------------|----------------------------------------------------------------------------------------------------------------------------------------------------------------------------------------------------------------------------------------------------------------------------------------------------------------------------------------------------------------------------------------------------------------------------------------------------------------------------------------------------------------------------------------|
|                  |            |              |                                                                          | Constant monitoring of national laws, which require to implement security policies by the enterprises, public institutions... (f.ex. in Spain, the Organic Law on Data Protection).                                                                                                                                                                                                                                                                                                                                                    |
|                  |            |              |                                                                          | Constant monitoring of the different and current types of computer threats: viruses, computer worms, trojans, logic bombs or spyware.                                                                                                                                                                                                                                                                                                                                                                                                  |
| -Intra<br>-Inter | Technology | Failures     | Communication failures (Internal and/or with customers and/or suppliers) | <p>Analysis of the historical failures suffered by the communication systems</p> <p>Definition of maintenance policies of the communication systems</p> <p>Definition of continuous improvement and reengineering policies for the communication systems</p> <p>Definition and establishment of training policies of the focal enterprise human capital in ICT</p> <p>Implementation of the periodic reliability testing of the communications systems</p>                                                                             |
| -Intra           | Technology | Failures     | Unexpected failures in our internal information systems                  | <p>Analysis of the historical failures suffered by the information systems</p> <p>Training of human capital in ICTs</p> <p>Definition of maintenance policies of the information systems</p> <p>Definition of continuous improvement and reengineering policies for the information systems</p> <p>Definition, design and development of reliable, robust, ergonomic and efficient information systems</p> <p>Implementation of the periodic reliability testing of the information systems</p> <p>Definition of backups procedure</p> |
| -Intra           | Technology | Obsolescence | Obsolescence of our IT equipment and systems                             | <p>Analysis of the costs involved in supporting ICT equipment and systems</p> <p>Establishment of professional services contracts with technology providers (for example "pay-per-use" contracts or performance-based contracts)</p> <p>Continuous study of the information systems updates that support the applications of the focal company and the launch of new versions</p> <p>Implementation of open source systems</p> <p>Total preventive maintenance of ICT equipment</p>                                                    |

---

| Level | Origin | Suborigin | Disruptive event | Preventive actions / Preparedness Capacity                                                                              |
|-------|--------|-----------|------------------|-------------------------------------------------------------------------------------------------------------------------|
|       |        |           |                  | Planning during the software development of future migrations to other operating systems and/or more advanced equipment |

---
